# Supplementary material
Source: publisher figshare collection journal article supplement (https://sage.figshare.com/ndownloader/files/22164306)
Supplement: Supplementary file 1 [file 22164306]

**Le cannabidiol comme traitement des troubles de l’humeur : une revue systématique**

**Objectif :** Examiner les données probantes actuelles sur l’efficacité du cannabidiol dans le traitement des troubles de l’humeur.

**Méthodes :** Nous avons systématiquement recherché dans PubMed, Embase, Web of Science, PsychInfo, Scielo, ClinicalTrials.gov et CENTRAL des études publiées jusqu’au 31 juillet 2019. Les critères d’inclusion étaient des essais cliniques, des études par observation ou des rapports de cas qui évaluent l’effet du cannabidiol pur ou du cannabidiol mélangé avec d’autres cannabinoïdes sur les symptômes de l’humeur liés aux troubles de l’humeur ou à d’autres états de santé. La revue a été rédigée conformément aux lignes directrices du protocole PRISMA.

**Résultats :** Sur les 924 études d’abord produites par la recherche, 16 ont été incluses dans l’échantillon final. Sur celles-ci, six étaient des études cliniques qui utilisaient le cannabidiol pour traiter d’autres états de santé mais qui évaluaient les symptômes de l’humeur comme résultat additionnel. De même, quatre études testaient le cannabidiol mélangé avec du *∆*-9-tétrahydrocannabinol dans le traitement d’états de santé généraux et évaluaient les symptômes affectifs comme résultats secondaires. Deux étaient des rapports de cas testant le cannabidiol. Quatre études étaient des études par observation qui évaluaient l’utilisation du cannabidiol et ses corrélats cliniques. Cependant, aucun essai clinique n’investiguait l’efficacité du cannabidiol, spécifiquement dans les troubles de l’humeur, ni n’évaluait les symptômes affectifs comme résultat principal. Bien que certains articles laissent présager les avantages du cannabidiol pour traiter les symptômes dépressifs, la méthodologie variait à plusieurs égards et le niveau des données probantes ne suffit pas à l’indiquer comme traitement des troubles de l’humeur.

**Conclusions :** Les données probantes actuelles ne suffisent pas pour recommander le cannabidiol comme traitement des troubles de l’humeur. Toutefois, compte tenu des données probantes précliniques et cliniques liées à d’autres maladies, le cannabidiol pourrait jouer un rôle comme traitement des troubles de l’humeur. Il y a donc un urgent besoin d’essais cliniques bien conçus qui recherchent l’efficacité du cannabidiol dans les troubles de l’humeur.

**Numéro d’enregistrement** (PROSPERO) : 42019119766.
